# Supplementary material
Source: HighWire-hosted journal article supplement (https://ijgc.bmj.com/highwire/filestream/16353/field_highwire_adjunct_files/1/ijgc-2020-001640supp002_data_supplement.pdf)

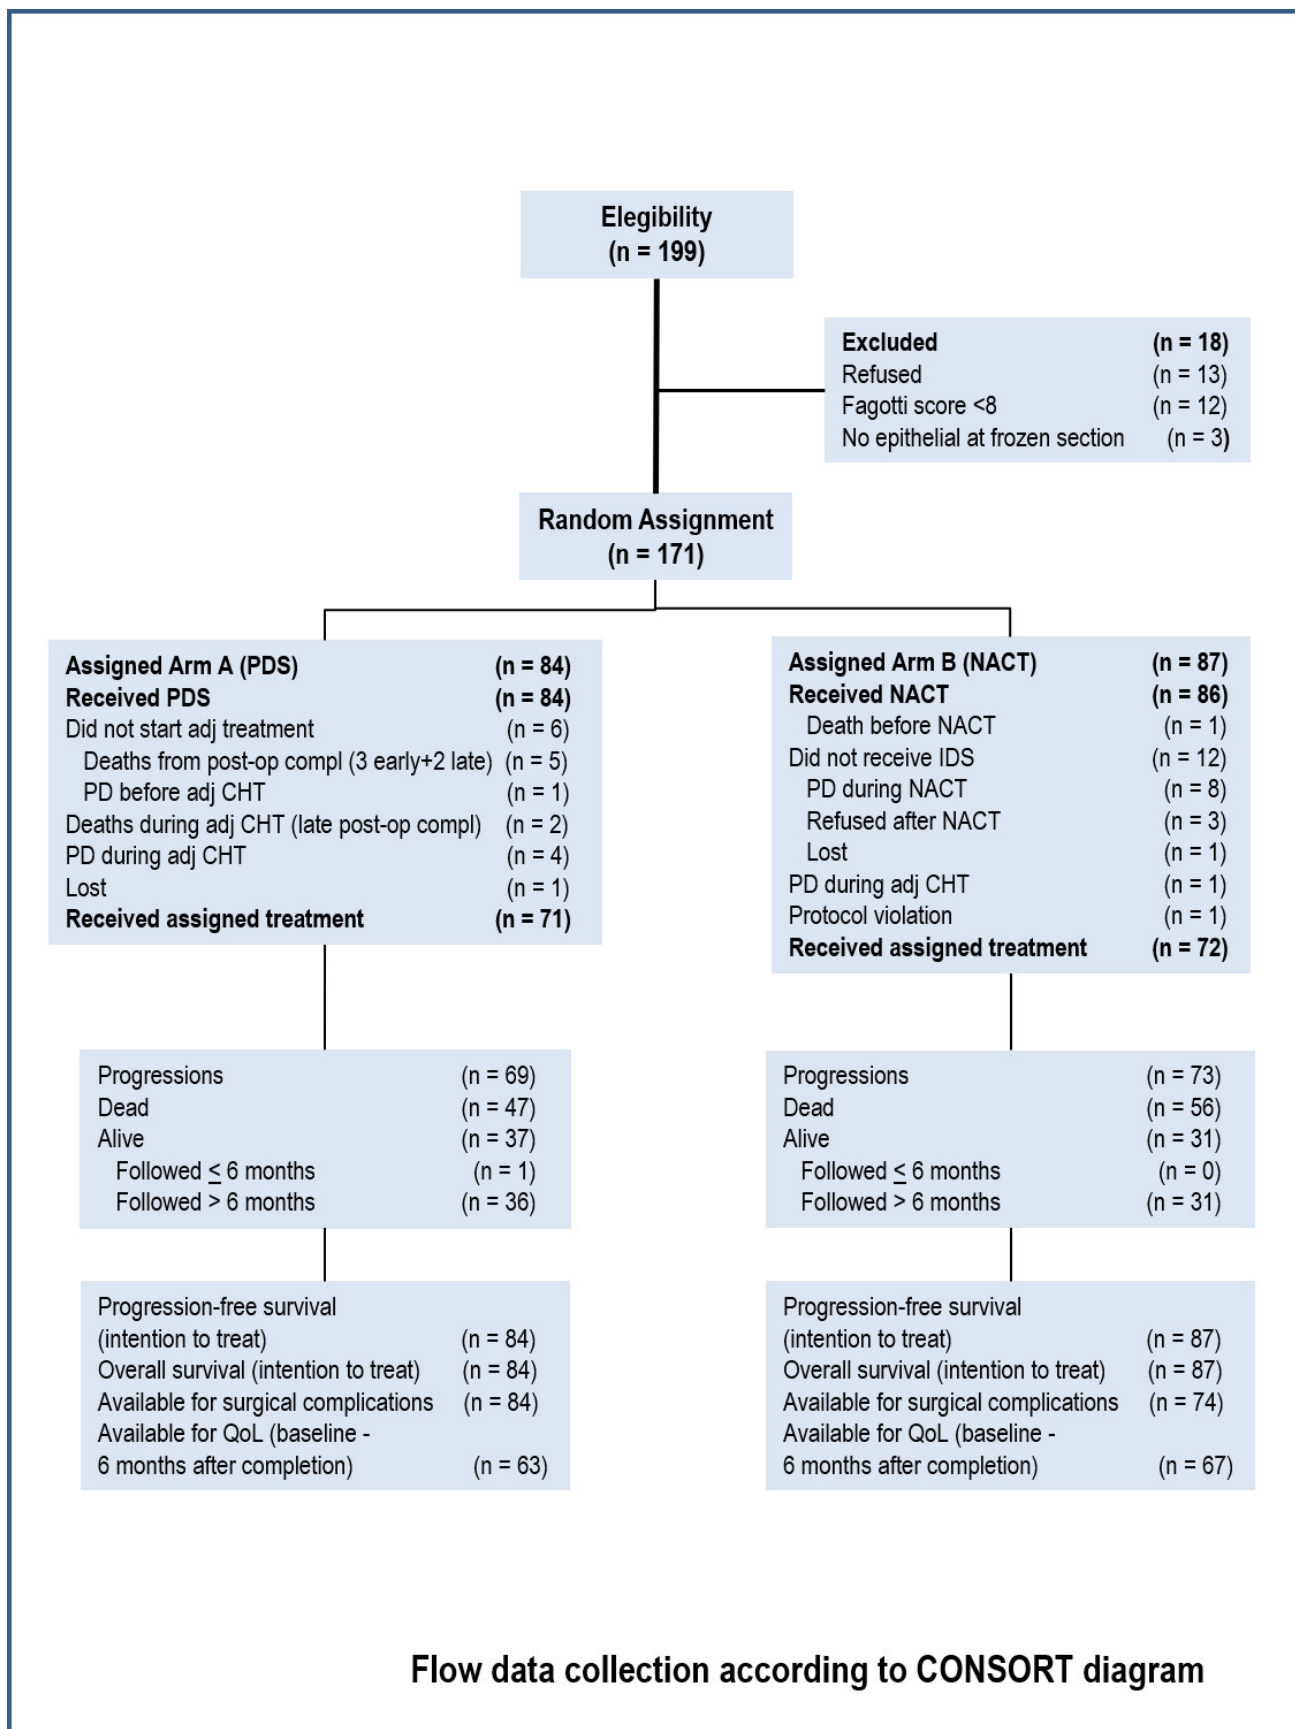

Supplement: ijgc-2020-001640supp002_data_supplement.pdf [file ijgc-2020-001640supp002_data_supplement.pdf]
